# Supplementary material
Source: Springer Nature journal article supplement (https://www.springermedizin.de/resource/supplementary/12967_2010_665_MOESM6_ESM.pdf/9577394)

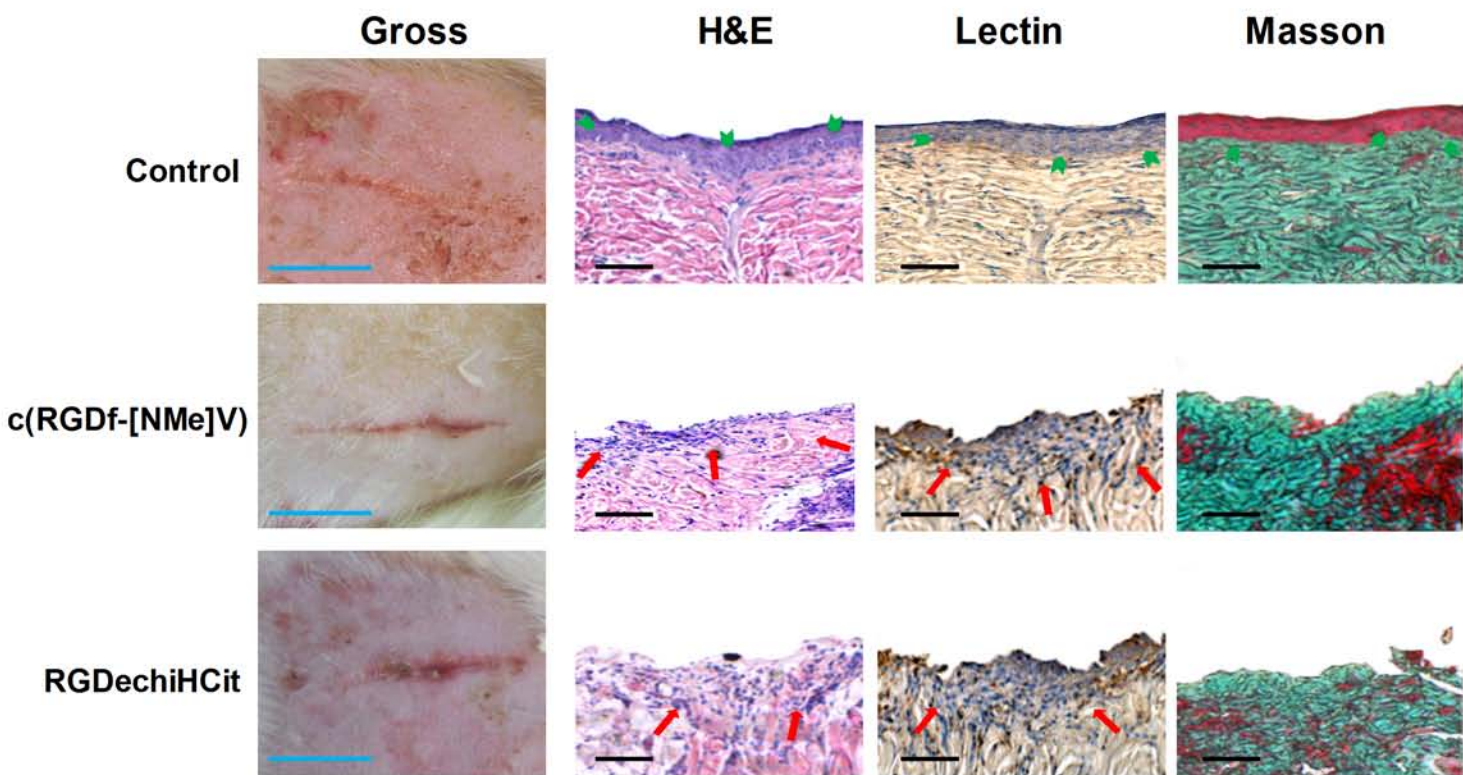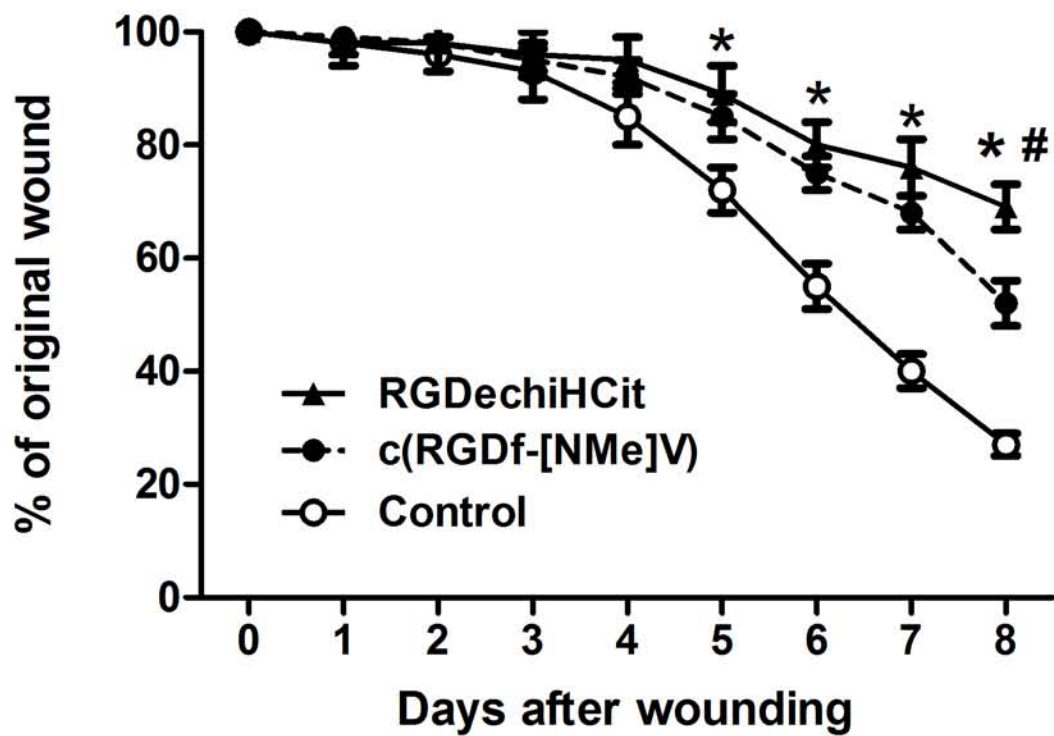

Supplement: MOESM6 [file 9577394]
